# Supplementary material for: Preparation and Electrochemical Characterization of Si@C Nanoparticles as an Anode Material for Lithium-Ion Batteries via Solvent-Assisted Wet Coating Process
Source: MDPI journal article supplement (doi:10.3390/nano12101649), 2022-05-12
Supplement: s1 [file s1]

Supplementary Materials

# Preparation and Electrochemical Characterization of Si@C Nanoparticles as an Anode Material for Lithium-Ion Batteries via Solvent-Assisted Wet Coating Process

Jongha Hwang <sup>1,†</sup>, Mincheol Jung <sup>1,†</sup>, Jin-Ju Park <sup>1,†</sup>, Eun-Kyung Kim <sup>1</sup>, Gunoh Lee <sup>2</sup>, Kyung Jin Lee <sup>2</sup>, Jae-Hak Choi <sup>1,\*</sup> and Woo-Jin Song <sup>1,\*</sup>

<sup>1</sup> Department of Polymer Science and Engineering, Chungnam National University, Daejeon 34134, Korea; jongha3238@o.cnu.ac.kr (J.H.); mnb7809@o.cnu.ac.kr (M.J.); wlswnsla09@gmail.com (J.-J.P.); ek\_dmsrud11kr14@gmail.com (E.-K.K.)

<sup>2</sup> Department of Chemical Engineering and Applied Chemistry, Chungnam National University, Daejeon 34134, Korea; golee124@gmail.com (G.L.); kjlee@cnu.ac.kr (K.J.L.)

\* Correspondence: jaehakchoi@cnu.ac.kr (J.-H.C.); wjsong@cnu.ac.kr (W.-J.S.)

† These authors have contributed equally to this work.

**Citation:** Hwang, J.; Jung, M.; Park, J.-J.; Kim, E.-K.; Lee, G.; Lee, K.J.; Choi, J.-H.; Song, W.-J. Preparation and Electrochemical Characterization of Si@C Nanoparticles as an Anode Material for Lithium-Ion Batteries via Solvent-Assisted Wet Coating Process. *Nanomaterials* **2022**, *12*, 1627. <https://doi.org/10.3390/nano12101627>

Academic Editors: Zhipeng Sun, Bin Dong and Dong Xie

Received: 2 April 2022

Accepted: 5 May 2022

Published: 12 May 2022

**Publisher's Note:** MDPI stays neutral with regard to jurisdictional claims in published maps and institutional affiliations.

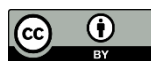

**Copyright:** © 2022 by the authors. Licensee MDPI, Basel, Switzerland. This article is an open access article distributed under the terms and conditions of the Creative Commons Attribution (CC BY) license (<https://creativecommons.org/licenses/by/4.0/>).

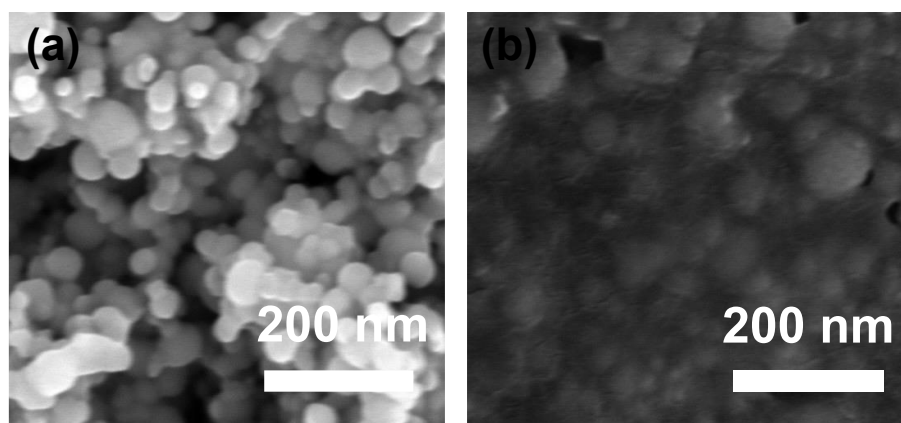

**Figure S1.** The SEM image of (a) Si NPs and (b) phenolic resin-coated Si NPs.

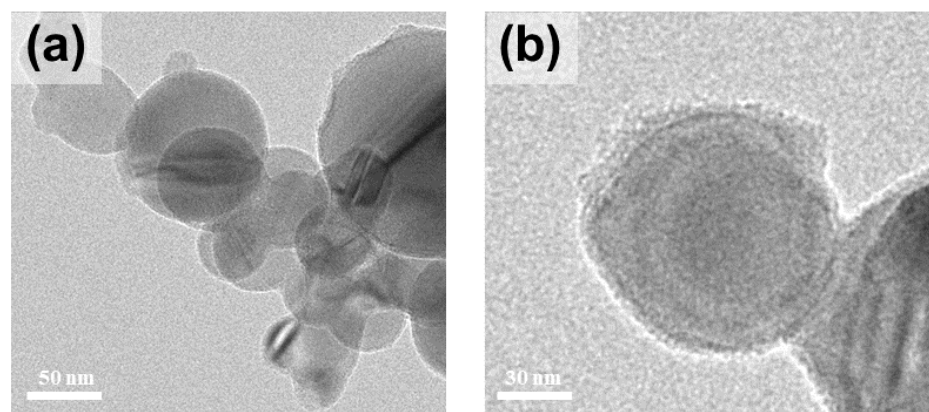

**Figure S2.** High resolution TEM images of (a,b) Si@C.

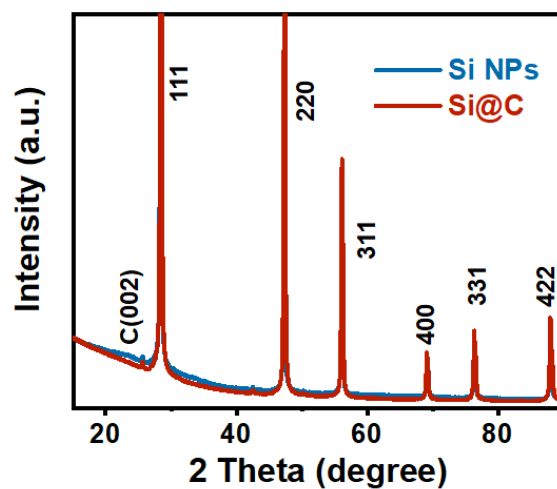

Figure S3. XRD data of Si NPs and Si@C.

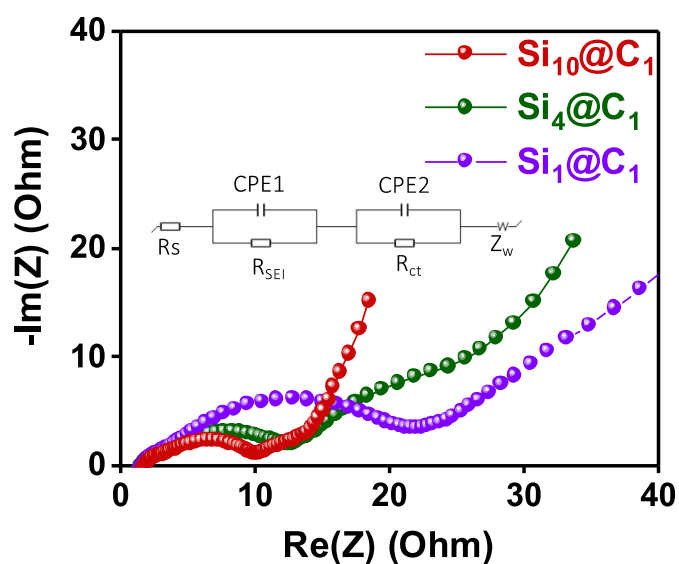

Figure S4. EIS data of Si<sub>10</sub>@C<sub>1</sub>, Si<sub>4</sub>@C<sub>1</sub>, and Si<sub>1</sub>@C<sub>1</sub>.

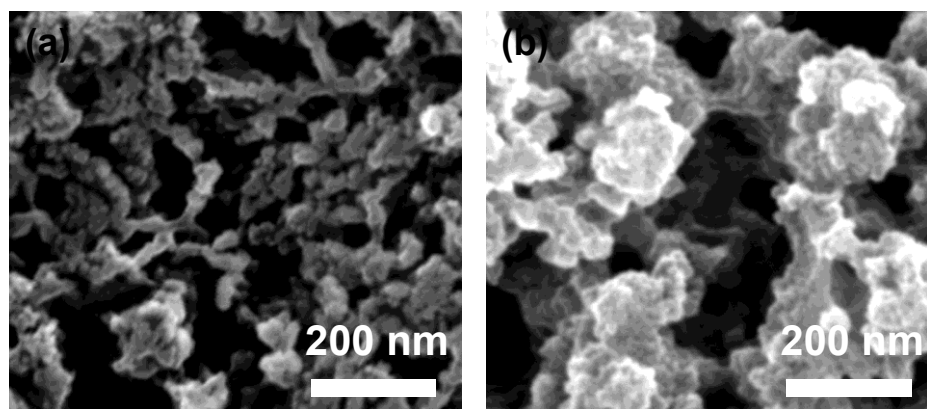

Figure S5. The SEM image of (a) Si NPs electrode and (b) Si<sub>10</sub>@C<sub>1</sub> electrode after 100 cycles.

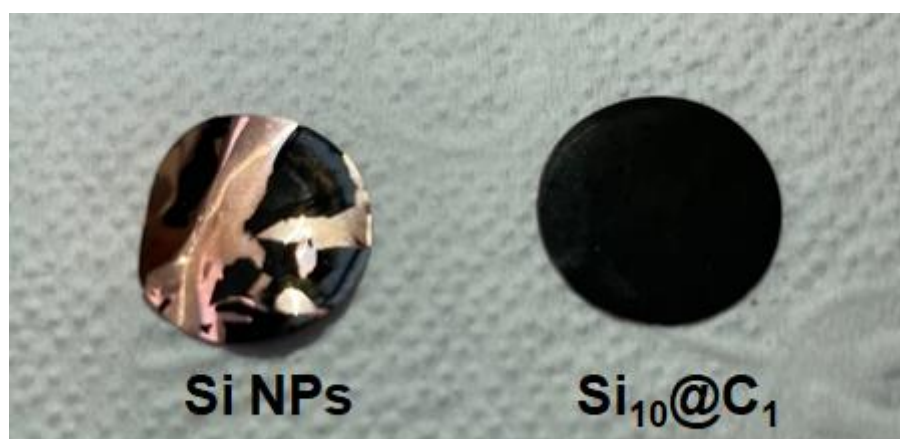

Figure S6. The photo image of Si and Si<sub>10</sub>@C<sub>1</sub> electrodes after 100 cycles.

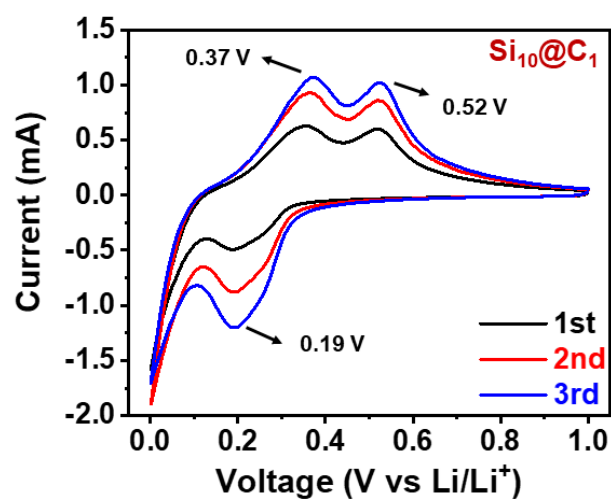

Figure S7. The cyclic voltammetry curves of Si@C anode.

Table S1. EIS data of Si NPs and Si<sub>10</sub>@C<sub>1</sub>.

| Electrodes.                          | $R_s$ | $R_{SEI}$ | $R_{ct}$ |
|--------------------------------------|-------|-----------|----------|
| Si NPs                               | 1.82  | 19.46     | 7.68     |
| Si <sub>10</sub> @C <sub>1</sub> NPs | 1.84  | 10.04     | 3.51     |

Table S2. Comparison of electrochemical performance of various carbon-coated silicon anodes.

| Active Material    | Carbon Precursors       | Discharge Capacity (mA h g <sup>-1</sup> ) | ICE (%) | Retention (%) / Cycles | Capacity after Cycles (mA h g <sup>-1</sup> ) | Ref      |
|--------------------|-------------------------|--------------------------------------------|---------|------------------------|-----------------------------------------------|----------|
| Si NPs (~50 nm)    | Phenolic resin          | 2283                                       | 66.7    | 86.3/50                | 1107                                          | [1]      |
| Si NPs (~100 nm)   | Dopamine                | 2258                                       | 72.2    | 83/50                  | 804                                           | [2]      |
| Si NPs             | Graphene/egg white      | 2169                                       | 86.2    | 56/200                 | 1045                                          | [3]      |
| Si NPs (50~100 nm) | rGO                     | 2200                                       | 61      | 63/200                 | 968                                           | [4]      |
| Si NPs (~50 nm)    | Reusable phenolic resin | 3092                                       | 83.5    | 100/50                 | 1140                                          | Our work |

## Reference

1. Lu, Z.; Li, B.; Yang, D.; Lv, H.; Xue, M.; Zhang, C., A self-assembled silicon/phenolic resin-based carbon core-shell nanocomposite as an anode material for lithium-ion batteries. *RSC Adv.* **2018**, *8*, 3477–3482.
2. Pan, L.; Wang, H.; Gao, D.; Chen, S.; Tan, L.; Li, L.; Facile synthesis of yolk-shell structured Si-C nanocomposites as anodes for lithium-ion batteries. *Chem. Commun.* **2014**, *50*, 5878–5880.
3. Ou, J.; Jin, F.; Wang, H.; Wu S.; Zhang, H.; Carbon coated Si nanoparticles anchored to graphene sheets with excellent cycle performance and rate capability for Lithium-ion battery anodes, *Surf. Coat. Technol.* **2021**, *418*, 127262.
4. Wang, Q.; Meng, T.; Li, Y.; Yang, J.; Huang, B.; Ou, S.; Meng, C.; Zhang, S.; Tong, Y. Consecutive chemical bonds reconstructing surface structure of silicon anode for high-performance lithium-ion battery. *Energy Storage Mater.* **2021**, *39*, 354–364.
